# Supplementary material for: A Novel Rodent Model of Hypertensive Cerebral Small Vessel Disease with White Matter Hyperintensities and Peripheral Oxidative Stress
Source: MDPI journal article supplement (doi:10.3390/ijms23115915), 2022-05-25
Supplement: s1 [file s1]

# Supplementary Materials:

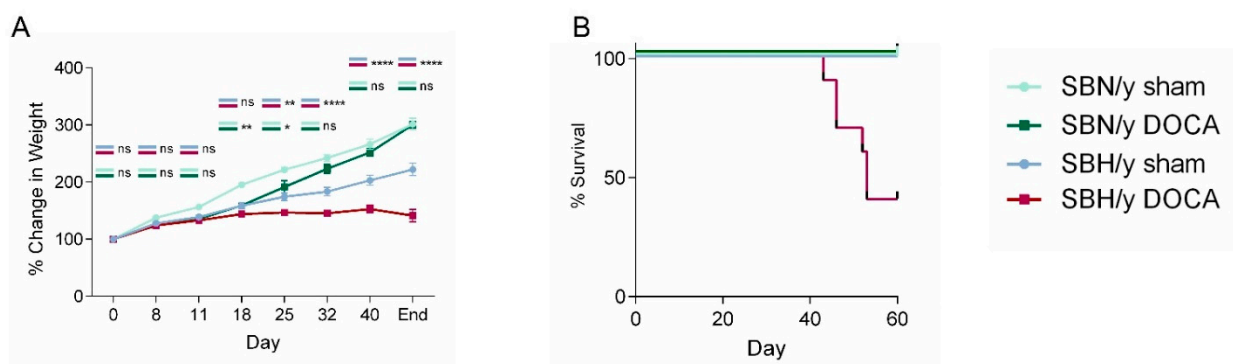

**Figure S1: Growth curve.** Growth rate normalized to baseline body weight of SBH/y sham ( $n=8$ ), SBH/y-DOCA ( $n=11$ ), SBN/y sham ( $n=4$ ) and SBN/y-DOCA ( $n=4$ ) rats (**A**).  $*P < 0.05$ ,  $**P < 0.01$ ,  $***P < 0.001$ ,  $****P < 0.0001$ . Two-way ANOVA.

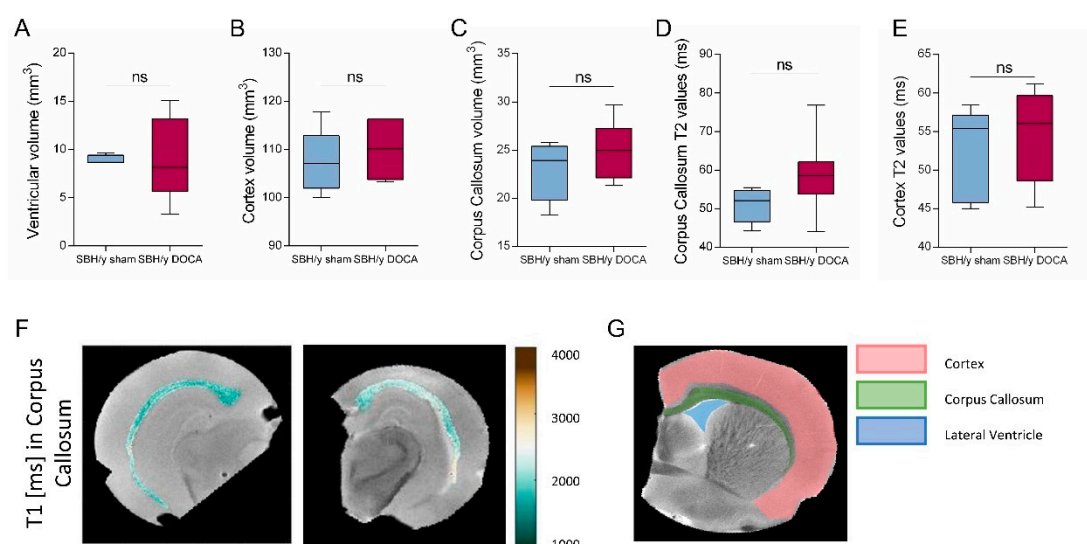

**Figure S2: MRI measures and masks.** Volume of ventricle (**A**), cortex (**B**) and corpus callosum (**C**), and average T2 values of cortex (**D**) and corpus callosum (**E**) of SBH/y sham ( $n=6$ ) and SBH/y-DOCA ( $n=9$ ) rats. Representative T1 values of corpus callosum of SBH/y sham and SBH/y DOCA brains (**F**). Example of masks used to analyze MRI images (**G**). Boxplot presents the median and interquartile range, the whiskers show extreme data points, two-tailed t-test in (**A-E**).

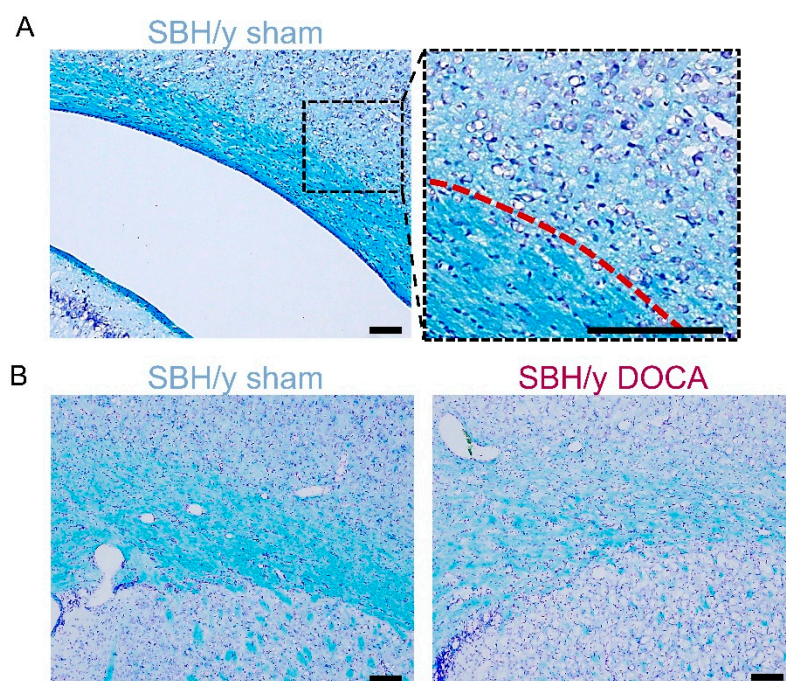

**Figure S3: White matter staining of SBH/y sham and SBH/y-DOCA brains.** Representative luxol blue and cresyl violet staining of SBH/y sham and 5x magnification of the white matter-grey matter interface (A). Spotted red line identify the border between the white matter and the grey matter. Another representative luxol blue and cresyl violet staining of SBH/y sham and SBH/y-DOCA brains, indicating on white matter pathology (B). Scale bars = 200 μm.
